# Supplementary material
Source: PubMed Central journal article supplement (PMC4520169)
Supplement: ASN.2014050480_ASN2014050480SupplementaryData.pdf [file ASN.2014050480_ASN2014050480SupplementaryData.pdf]

## **Material and methods:**

***Patients, study cohorts*** – The University Hospital Ethical Committee and the Committee for the Protection of Patients from Biological Risks approved the study. All patients who participated in this study gave informed consent. A total of 65 age-matched kidney transplant patients were included in the study (summary of clinical data in Table I). Criteria for operational tolerance have been described in detailed elsewhere (1). Briefly renal allograft recipients were separated in three groups: (i) tolerant recipients defined as patients with a well functioning graft ( $<150\mu\text{M/L}$  and proteinuria  $<1\text{g}/24\text{h}$ ) without immunosuppression for more than one year (TOL,  $n=13$ ); (ii) patients defined as patients with a well functioning graft (creatinine  $<150\mu\text{M/L}$  and proteinuria  $<1\text{g}/24\text{h}$ ) under classic immunosuppressive therapy (STA,  $n=33$ ); (iii) patients with signs of graft rejection and functional degradation (creatinine  $>150\mu\text{M/L}$  and proteinuria  $>1\text{g}/24\text{h}$ ) (RC,  $n=19$ ). (iv) Finally an additional group of healthy volunteers with no known history of infection or other pathologies was included as a control (HV,  $n=15$ ). Clinical and demographical data of these patients are summarized in Table 1.

***Antibodies, flow cytometry and cell sorting*** - The following antibodies and reagents were used for flow cytometry and cell sorting: CD45-PO (Caltag, Invitrogen, Darmstadt, Germany), CD3-AlexaFluor-700, anti-CD45-PE and CD4-PB (both from BD Biosciences, Heidelberg, Germany), CD3 Brilliant-Violet-605, CD4 APC-Cy7, CD45RA-PeCy7, CCR7-PE, CD25 Brilliant-Violet-421, CD127-AlexaFluor-647 (Biolegend, San Diego, USA) Foxp3-PercpCy5.5, GITR-APC, CD39-APC, Lag3-Pe and CTLA4-Pe, (eBioscience, San Diego, USA) anti-CD4-FITC (Miltenyi Biotec, Bergisch Gladbach, Germany) and anti-CD25-Alexa Fluor 647 (anti-CD25 from Immunotech, Marseille, France). Live/Dead Fixable Aqua stain was used to exclude dead

cells. Thawed PBMC samples were stained in PBS with 5% SVF and 2mM EDTA for 15' at 4°C in the dark. For Foxp3 intranuclear staining, cells were fixed and permeabilized with the Foxp3 staining Kit (eBioscience, San Diego, USA) according to the manufacturer's instructions. Flow cytometry was performed on a BD LSR II cytometer (BD Bioscience, San Diego, USA) and cell sorting was performed on a FACSARIAIII (BD Biosciences, San Diego, USA). Compensations were set using BD compbeads (BD Biosciences, San Diego, USA). For Sorting, DAPI was used to exclude dead cells. Effector T cells were sorted based on the CD3<sup>+</sup> CD4<sup>+</sup> CD25<sup>-</sup> phenotype, total regulatory T cells were sorted based on the CD3<sup>+</sup> CD4<sup>+</sup> CD25<sup>+</sup> CD127<sup>low</sup> phenotype and mTregs based on the phenotype CD3<sup>+</sup> CD4<sup>+</sup> CD25<sup>hi</sup> CD45RA<sup>-</sup>. Post-sort analysis revealed a purity of > 95%.

***Foxp3 TSDR quantification*** - Genomic DNA was isolated from PBMC samples, purified CD4<sup>+</sup> T cells and FACS-sorted regulatory T cells using the QIAamp<sup>R</sup> DNA Blood Mini kit (Qiagen, Hilden, Germany). 500ng eluted genomic DNA was given a subsequent bisulfite treatment (EpiTect<sup>R</sup>, Qiagen, Hilden, Germany). A minimum of 60ng bisulfite-treated genomic DNA was then used in a Realtime-PCR to quantify the Foxp3 TSDR. Real time-PCR was performed with a final reaction volume of 20 µl containing 10 µl FastStart Universal Probe Master (ROX) (Roche Diagnostics, Mannheim, Germany), 50ng/µl Lambda DNA (New England Biolabs, Frankfurt, Germany), 5 pmol/µl methylation or non-methylation specific probe, 30 pmol/µl methylation or non-methylation specific primer and 60 ng bisulfite-treated DNA or the same amount of plasmid standard. The samples were analyzed in triplicate in an ABI 7500 Cycler using the following cycling schedules: 1 cycle of 10min 95°C and 45 cycles of 15s 95°C followed by 1 min 61°C. % Foxp3 TSDR content was then calculated by dividing the non-methylated copy number by the total genomic Foxp3 copy number. When PBMC samples

were used, the results obtained were adjusted to the individual % CD4<sup>+</sup> T cells (Flow Cytometry). For female patients the results were doubled. For detailed instruction see also (24).

**Suppression assay** - RPMI 1640 medium supplemented with 10% fetal bovine serum, 100 IU/mL penicillin, and 100µg/mL streptomycin and L-glutamine was used for T cell culture (Life technologies, Carlsbad, CA). 96-well round-bottom plates were coated with 0.5µg/mL of anti-CD3 (OKT3 mAb) and then  $1 \times 10^5$  CD4<sup>-</sup> irradiated feeders cells were added to the plates. CD4<sup>+</sup>CD25<sup>-</sup> responder T cells were labeled with Cell Trace Violet (Invitrogen, Cergy Pontoise, France) following the manufacturer's instructions and  $1 \times 10^4$  cells were seeded. Suppressive activity was assessed by the addition of  $1 \times 10^4$  or  $2 \times 10^4$  CD4<sup>+</sup>CD25<sup>hi</sup>CD45RA<sup>-</sup> unlabeled mTreg cells per well. After 96 hours of culture the cells were stained with the anti-CD4-FITC antibody and the proliferation of CD4<sup>+</sup> Cell Trace Violet labeled cells was assessed by flow cytometry using an LSRII cytometer and FACSDiva™ software (BD Parmingen, Mountain View, CA).

**Statistical analysis** – We compared subject group characteristics using chi-square testing as appropriate. The non-parametric Kruskal Wallis test was used for comparison of more than 2 groups. Differences were defined as statistically significant when  $p < 0.05$  (\*),  $p < 0.01$  (\*\*) and  $p < 0.001$  (\*\*\*). Correlations were analyzed by linear regression. All statistical analysis was performed in GraphPad Prism v6.

# Supplemental Figure 1

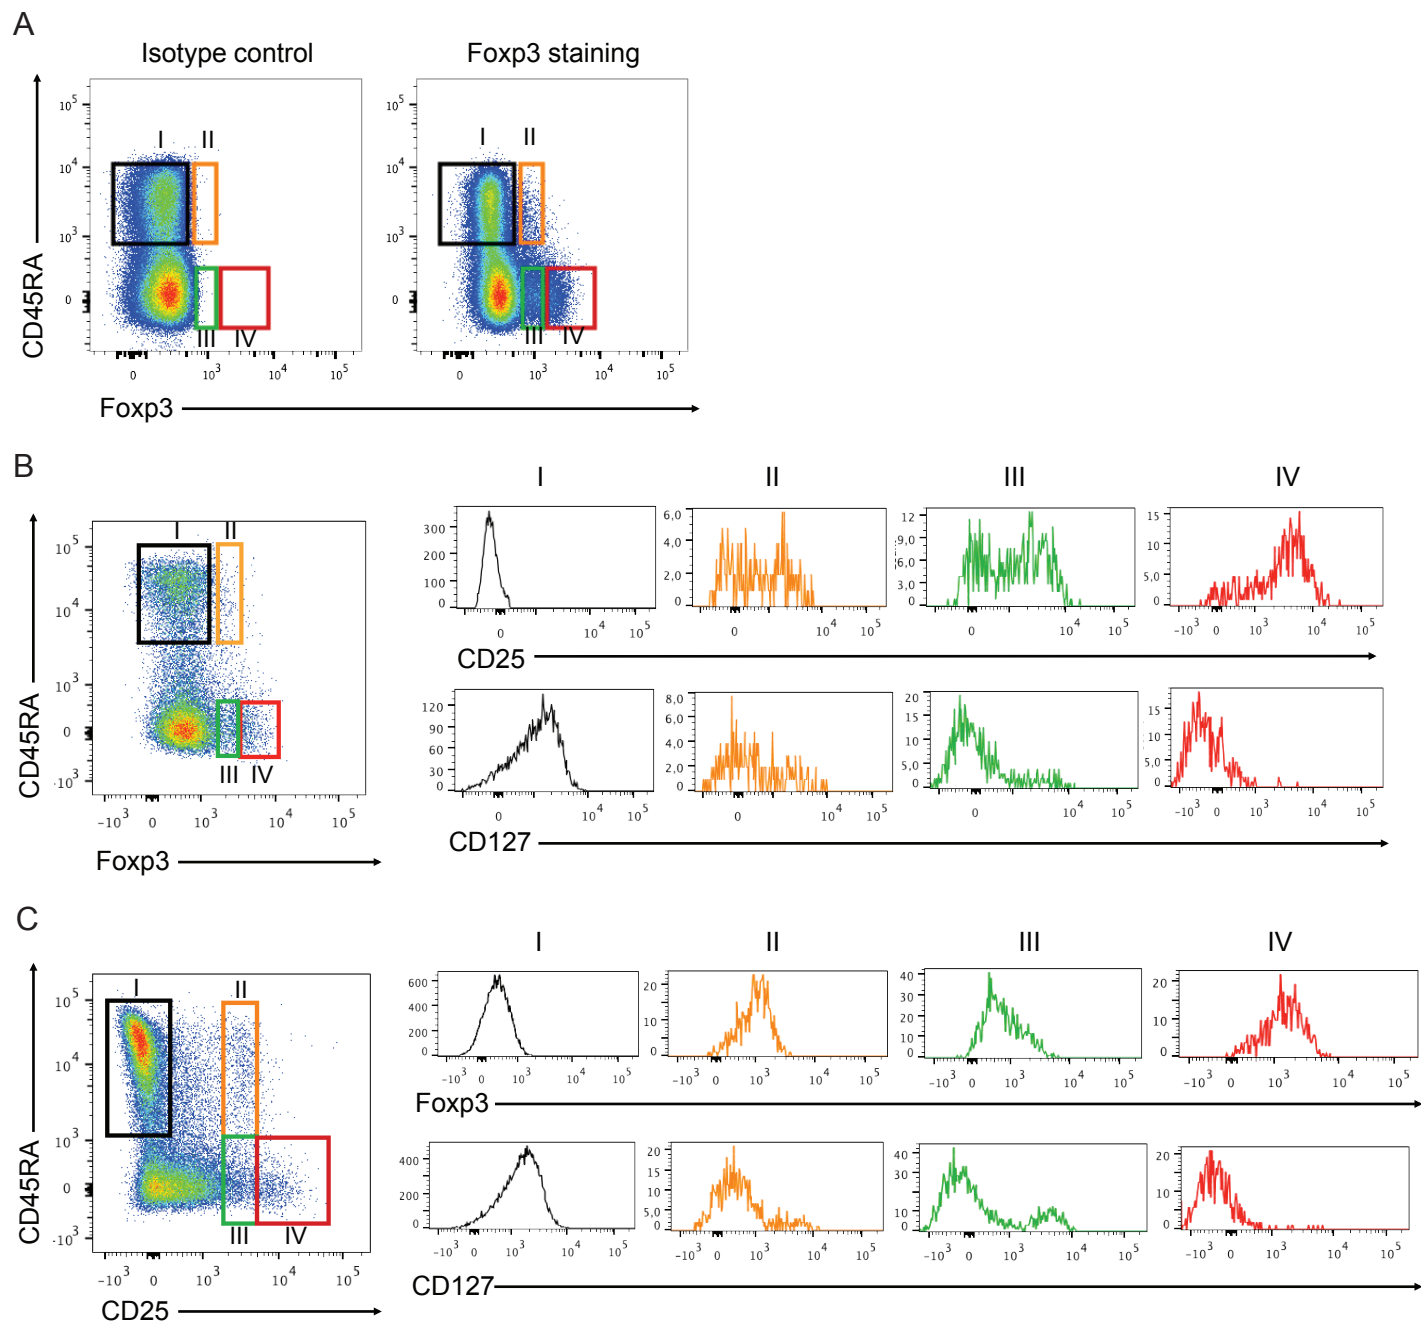

|          | Age (years) | Gender | Donor (living vs deceased) | Number of HLA mismatches | Previous episode of acute rejection | Lymphoma status, cancer | Episode of acute infection (CMV) | Time between graft and analysis (months) | Creatinemia (µmol/L) | Proteinuria g/24h | medical treatment | Time between immunosuppression withdrawal and analysis (years) | Reason of immunosuppression withdrawal | Banff/histology           | C4d staining            | Ab sHLA | Donor specific Abs | Allograft glomerulopathy |      |
|----------|-------------|--------|----------------------------|--------------------------|-------------------------------------|-------------------------|----------------------------------|------------------------------------------|----------------------|-------------------|-------------------|----------------------------------------------------------------|----------------------------------------|---------------------------|-------------------------|---------|--------------------|--------------------------|------|
| Tolerant | 1           | 65     | M                          | NLD                      | 4                                   | 0                       | 0                                | 1                                        | 283                  | 108               | ND                | 0                                                              | 10                                     | Non-compliance            | ND                      | ND      | 0                  | 0                        | ND   |
|          | 2           | 84     | F                          | NLD                      | 3                                   | 1                       | 1                                | 1                                        | 230                  | 83                | ND                | 0                                                              | 17                                     | Initial renal degradation | ND                      | ND      | 1                  | anti-class II (DQ7)      | ND   |
|          | 3           | 45     | M                          | LD                       | 0                                   | 0                       | 0                                | 0                                        | 145                  | 116               | ND                | 0                                                              | 10                                     | Non-compliance            | ND                      | ND      | 0                  | 0                        | ND   |
|          | 4           | 57     | F                          | LD                       | 0                                   | 0                       | 0                                | 1                                        | 310                  | 63                | 0,02              | 0                                                              | 8                                      | Non-compliance            | ND                      | ND      | 0                  | 0                        | ND   |
|          | 5           | 48     | F                          | NLD                      | 1                                   | 0                       | 0                                | 0                                        | 115                  | 88,5              | 0,88              | 0                                                              | 8                                      | Non-compliance            | ND                      | ND      | 1                  | 0                        | ND   |
|          | 6           | 55     | M                          | NLD                      | 5                                   | 0                       | 1                                | 0                                        | 184                  | 104,8             | ND                | 0                                                              | 8                                      | Non-compliance            | ND                      | ND      | 1                  | anti-class II (DQ5)      | ND   |
|          | 7           | 84     | M                          | NLD                      | 3                                   | 0                       | 0                                | 1                                        | 226                  | 134               | 0                 | 0                                                              | 6                                      | Non-compliance            | ND                      | ND      | 0                  | 0                        | ND   |
|          | 8           | 40     | F                          | NLD                      | 2                                   | NA                      | 1                                | 1                                        | 267                  | 164,4             | 0,26              | 0                                                              | 8                                      | PTLD                      | ND                      | ND      | 0                  | 0                        | ND   |
|          | 9           | 55     | F                          | NLD                      | 4                                   | 0                       | 1                                | 1                                        | 235                  | 68                | ND                | 0                                                              | 2                                      | PTLD                      | ND                      | ND      | 1                  | 0                        | ND   |
|          | 10          | 48     | M                          | NLD                      | 4                                   | 1                       | 0                                | 0                                        | 347                  | 83                | 0,05              | 0                                                              | 15                                     | Non-compliance            | ND                      | ND      | 0                  | 0                        | ND   |
|          | 11          | 58     | F                          | NLD                      | 4                                   | NA                      | 0                                | 1                                        | 114                  | 77                | 0,15              | 0                                                              | 5                                      | Non-compliance            | ND                      | ND      | 0                  | 0                        | ND   |
|          | 12          | 30     | M                          | NLD                      | 0                                   | 0                       | 0                                | 0                                        | 156                  | 216               | 0,48              | 0                                                              | 4                                      | meningo-encephalitis      | ND                      | ND      | 0                  | 0                        | ND   |
|          | 13          | 13     | M                          | NLD                      | 3                                   | 0                       | 1                                | 0                                        | 211                  | 119               | 1,69              | 0                                                              | 10                                     | PTLD                      | Fibrose intimal Grade I | ND      | 0                  | 0                        | 0,00 |

Supplemental Table 1: Clinical characteristics of operationally tolerant patients.
